# Supplementary material
Source: HighWire-hosted journal article supplement (https://erj.ersjournals.com/content/58/2/2000332)

## Online data supplement

# Serum and Pulmonary Uric Acid in Pulmonary Arterial Hypertension

**Running title:** *Savale et al.*; Role of Urate in PAH

Laurent Savale<sup>1,2,3</sup>, Satoshi Akagi<sup>1,2</sup>, Ly Tu<sup>1,2</sup>, Amélie Cumont<sup>1,2</sup>, Raphaël Thuillet<sup>1,2</sup>,  
Carole Phan<sup>1,2</sup>, Benjamin Le Vely<sup>1,2</sup>, Nihel Berrebeh<sup>1,2</sup>, Alice Huertas<sup>1,2,3</sup>, Xavier Jaïs<sup>1,2,3</sup>, Vincent  
Cottin<sup>4</sup>, Ari Chaouat<sup>5</sup>, Cécile Tromeur<sup>6</sup>, Athénaïs Boucly<sup>1,2,3</sup>, Etienne Marie Jutant<sup>1,2,3</sup>, Olaf  
Mercier<sup>1,2,7</sup>, Elie Fadel<sup>1,2,7</sup>, David Montani<sup>1,2,3</sup>, Olivier Sitbon<sup>1,2,3</sup>, Marc Humbert<sup>1,2,3</sup>, Yuichi  
Tamura<sup>1,2,8</sup>, Christophe Guignabert<sup>1,2</sup>

## Figure legend

### **Supplemental figure S1: Expressions of xanthine oxidase (XO) and URATv1 in human pulmonary endothelial cells (ECs) in idiopathic pulmonary arterial hypertension (iPAH).**

**(A)** Representative Western blots and quantification of the XO:GADPH and URATv1:GADPH ratios in cultured pulmonary ECs derived from control and iPAH patients. **(B)** Conditioned media from 24 h serum starved pulmonary ECs were measured for secreted UA levels using a specific uric acid assay. Data are presented as mean  $\pm$  SEM (n=5-11). Comparisons were made using the nonparametric Mann-Whitney U test. \* p-value < 0.05 *versus* control PA-ECs. AU = arbitrary unit.

### **Supplemental Figure S2: High uric acid (UA) concentrations promote reactive oxygen species (ROS) production in pulmonary artery smooth muscle cells (PA-SMCs) derived from patients with idiopathic pulmonary arterial hypertension (iPAH).**

Representative images and quantification of the intracellular ROS generation using fluoregenic probes dihydroethidium (DHE) in control and iPAH PA-SMCs treated 30 minutes with UA at the indicated doses.

**Supplemental Figure S3: (A)** Values of mean pulmonary arterial pressure (mPAP), cardiac output, total pulmonary vascular resistance (PVR), and of Fulton index in control and MCT-injected rats **(B)** Representative images of  $\alpha$ -smooth muscle (SM) actin-stained sections of distal pulmonary arteries and quantification of the percentage of wall thickness and of muscularized distal pulmonary arteries in lungs of control and MCT-injected rats. Scale bar = 20  $\mu$ m in all sections. Values are means $\pm$ SEM (n=4-5). Comparisons were made using 1-way ANOVA with Tukey's post hoc tests. \* p-value <0.05, \*\* p-value <0.01, \*\*\*\* p-value <0.0001 compared with control rats. AU = arbitrary unit.

**Supplemental Figure S4: (A)** Levels of uric acid (UA) in the serum of control animals, monocrotaline (MCT)-injected at Day-21 post-MCT injection (n=7-10). **(B)** Representative Western blots and quantification of the XO:GADPH and URATv1:GADPH ratios in lungs of control, and MCT-injected rats (n=7-10). Horizontal lines display the mean  $\pm$  SEM. Comparisons were made using 1-way ANOVA with Tukey's post hoc tests/ \* p-value <0.05, \*\* p-value <0.01, \*\*\* p-value <0.001, compared with control. AU = arbitrary unit.

**Supplemental Table S1: univariate analysis for transplant-free survival**

|                                           | baseline            |         | First re-evaluation  |         |
|-------------------------------------------|---------------------|---------|----------------------|---------|
|                                           | HR (95% CI)         | P value | HR (95% CI)          | P value |
| Age, <i>years</i>                         | 1.049 (1.036-1.062) | <0.0001 | 1.047 (1.029-1.065)  | <0.0001 |
| Sex, <i>female vs male</i>                | 0.574 (0.490-0.803) | 0.001   | 0.680 (0.404-1.145)  | 0.15    |
| BMI, <i>kg/m<sup>2</sup></i>              | 1.007 (0.982-1.033) | 0.58    | 0.976 (0.934-1.019)  | 0.27    |
| Hypertension, <i>yes vs no</i>            | 0.535 (0.380-0.752) | 0.003   | 3.344 (1.953-5.714)  | <0.0001 |
| Diabetis, <i>yes vs no</i>                | 0.749 (0.436-1.284) | 0.29    | 2.347 (1.312-4.201)  | 0.004   |
| NYHA-FC, <i>III-IV vs I-II</i>            | 1.625 (1.072-2.462) | 0.02    | 3.367 (2.008-5.649)  | <0.0001 |
| 6-min WD, <i>meters</i>                   | 0.995 (0.994-0.997) | <0.0001 | 0.994 (0.992-0.996)  | <0.0001 |
| RAP, <i>mmHg</i>                          | 1.025 (0.992-1.059) | 0.14    | 1.062 (1.008-1.118)  | 0.02    |
| PCWP, <i>mmHg</i>                         | 0.991 (0.952-1.032) | 0.66    | 1.065 (1.010-1.123)  | 0.02    |
| mPAP, <i>mmHg</i>                         | 0.987 (0.973-1.001) | 0.07    | 1.014 (0.990-1.038)  | 0.27    |
| Cardiac index, <i>l.min.m<sup>2</sup></i> | 0.873 (0.658-1.158) | 0.34    | 0.597 (0.405-0.880)  | 0.009   |
| PVR, <i>WU</i>                            | 0.997 (0.964-1.032) | 0.88    | 1.073 (0.999-1.152)  | 0.05    |
| BNP or NTproBNP, <i>high vs low</i>       | 2.088 (1.144-3.802) | 0.016   | 5.882 (2.873-12.048) | <0.0001 |
| <b>Uric acid, &gt; median value</b>       | 0.846 (0.603-1.186) | 0.33    | 1.754 (1.039-2.967)  | 0.03    |
| <b>Uric acid, mg/dL</b>                   | 1.001 (1.000-1.002) | 0.18    | 1.004 (1.002-1.006)  | 0.0003  |
| Diuretics, <i>yes vs no</i>               |                     |         | 2.381 (1.262-4.504)  | 0.007   |
| PAH therapies, <i>mono vs combo</i>       | -                   | -       | 0.769 (0.511-1.153)  | 0.66    |

Supplemental Fig. 1

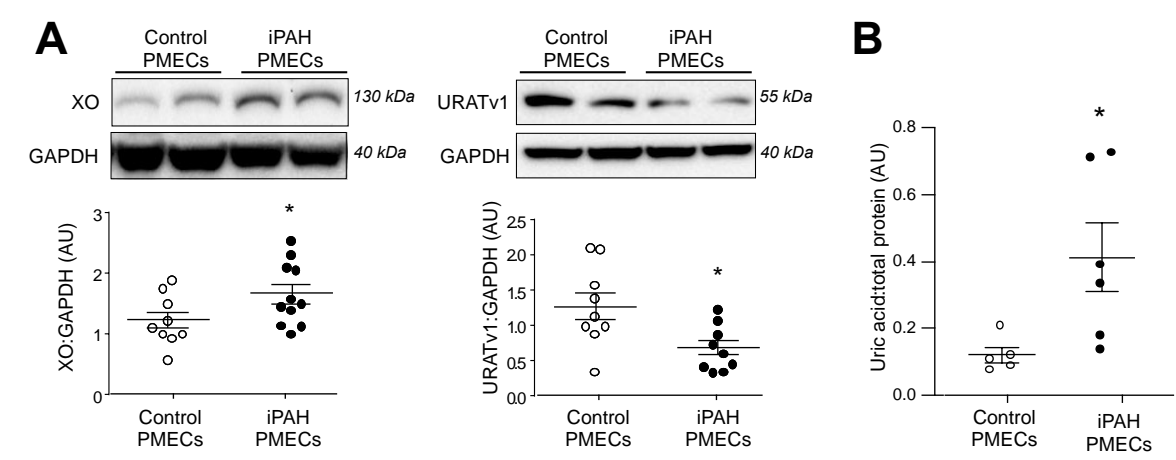

**Supplemental Fig. 2**

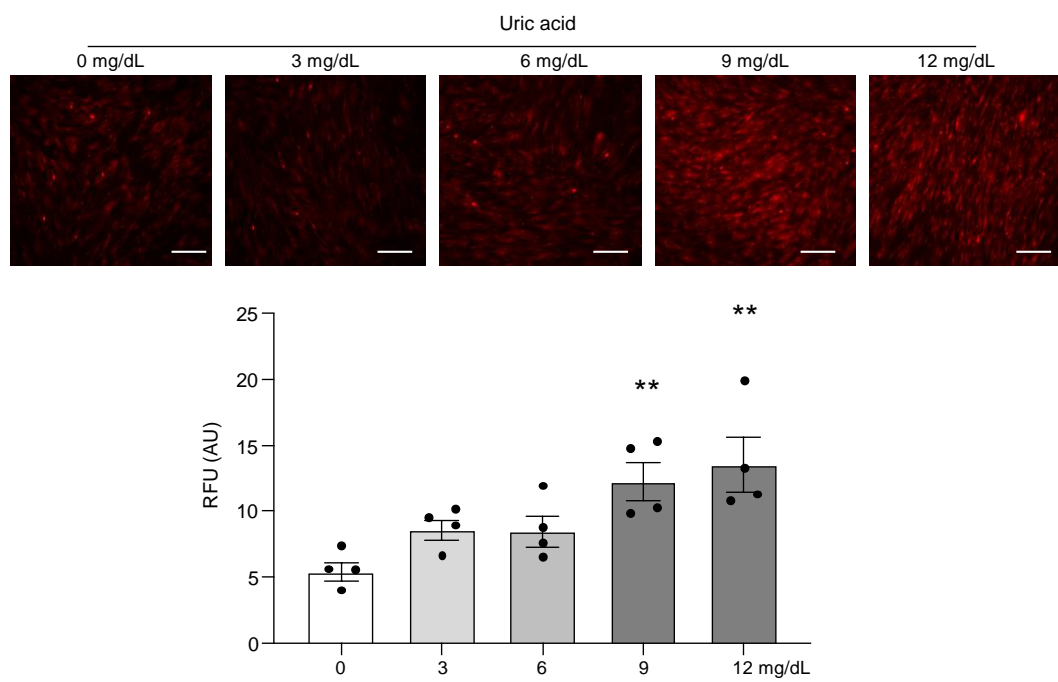

Supplemental Fig. 3

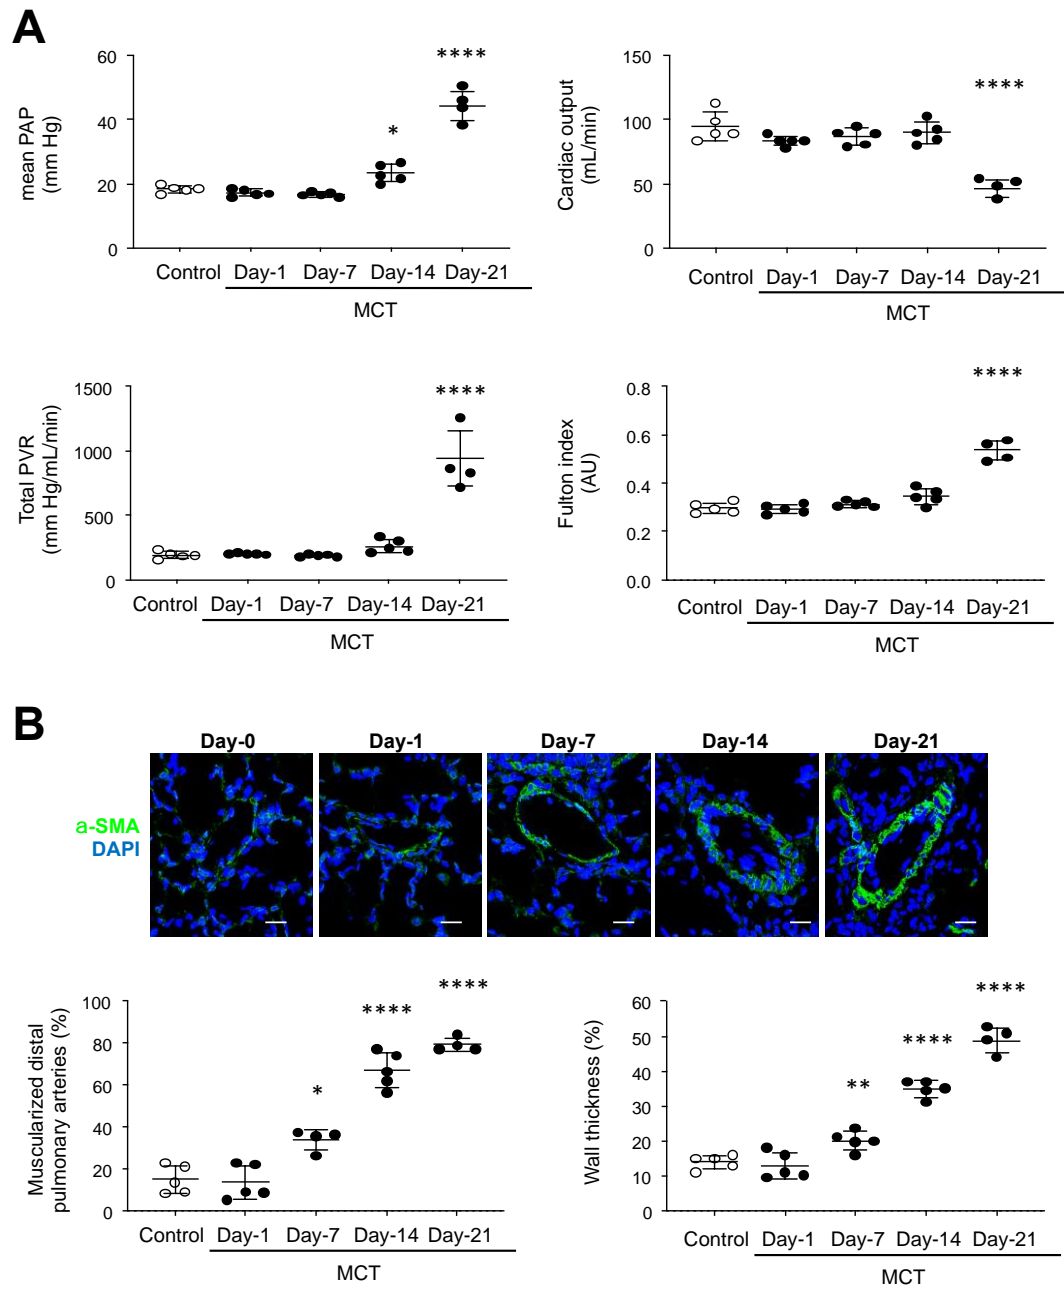

Supplemental Fig. 4

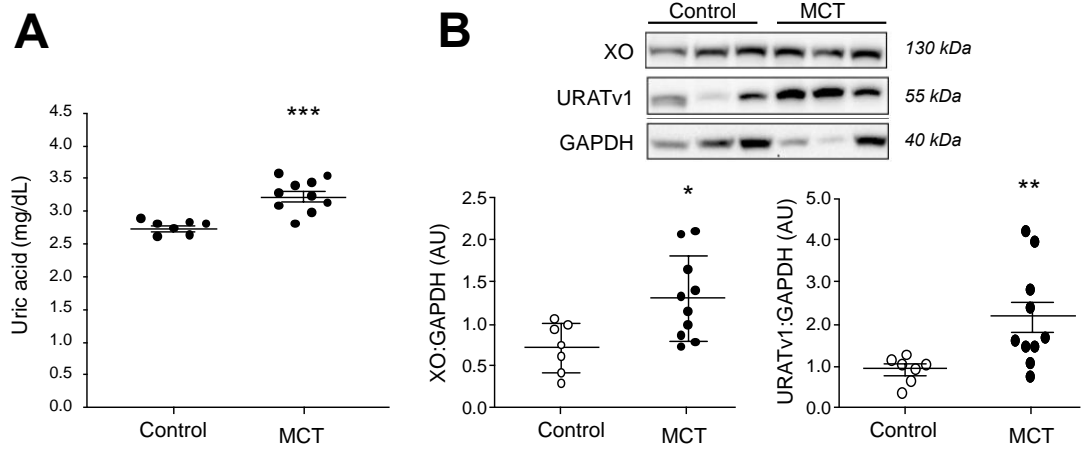

Supplement: inline-supplementary-material-1 [file inline-supplementary-material-1.pdf]
