# Supplementary material
Source: HighWire-hosted journal article supplement (https://erj.ersjournals.com/content/58/2/2000332)
Supplement: inline-supplementary-material-2 [file inline-supplementary-material-2.pdf]

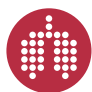

# Serum and pulmonary uric acid in pulmonary arterial hypertension

SHAREABLE PDF

Laurent Savale <sup>1,2,3</sup>, Satoshi Akagi <sup>1,2</sup>, Ly Tu <sup>1,2</sup>, Amélie Cumont<sup>1,2</sup>, Raphaël Thuillet<sup>1,2</sup>, Carole Phan<sup>1,2</sup>, Benjamin Le Vely<sup>1,2</sup>, Nihel Berrebeh<sup>1,2</sup>, Alice Huertas <sup>1,2,3</sup>, Xavier Jaïs<sup>1,2,3</sup>, Vincent Cottin <sup>4</sup>, Ari Chaouat <sup>5</sup>, Cécile Tromeur<sup>6,7,8</sup>, Athénaïs Boucly<sup>1,2,3</sup>, Etienne Marie Jutant <sup>1,2,3</sup>, Olaf Mercier<sup>1,2,9</sup>, Elie Fadel <sup>1,2,9</sup>, David Montani <sup>1,2,3</sup>, Olivier Sitbon <sup>1,2,3</sup>, Marc Humbert <sup>1,2,3</sup>, Yuichi Tamura <sup>1,2,10</sup> and Christophe Guignabert<sup>1,2</sup>

<sup>1</sup>School of Medicine, Université Paris-Saclay, Le Kremlin-Bicêtre, France. <sup>2</sup>INSERM UMR\_S 999 “Pulmonary Hypertension: Pathophysiology and Novel Therapies”, Hôpital Marie Lannelongue, Le Plessis-Robinson, France. <sup>3</sup>Assistance Publique - Hôpitaux de Paris (AP-HP), Dept of Respiratory and Intensive Care Medicine, Pulmonary Hypertension National Referral Center, Hôpital Bicêtre, Le Kremlin-Bicêtre, France. <sup>4</sup>Service de Pneumologie, Centre de Référence National des Maladies Pulmonaires Rares, Université Claude-Bernard Lyon 1, Hôpital Louis-Pradel, UMR754, INRAE, Lyon, France. <sup>5</sup>Département de Pneumologie, Université de Lorraine, CHRU de Nancy; INSERM U1116, Vandœuvre-lès-Nancy, France. <sup>6</sup>European Brittany University, Brest, France. <sup>7</sup>Dept of Internal Medicine and Chest Diseases, University Hospital Centre La Cavale Blanche, Brest, France. <sup>8</sup>Groupe d'Etude de la Thrombose de Bretagne Occidentale (GETBO), EA 3878, CIC INSERM 1412, Brest, France. <sup>9</sup>Dept of Thoracic and Vascular Surgery and Heart-Lung Transplantation, Groupe Hospitalier Paris Saint Joseph, Hôpital Marie Lannelongue, Le Plessis-Robinson, France. <sup>10</sup>Pulmonary Hypertension Center, International University of Health and Welfare Mita Hospital, Tokyo, Japan.

Corresponding author: Laurent Savale ([laurent.savale@aphp.fr](mailto:laurent.savale@aphp.fr))

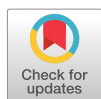

Shareable abstract (@ERSpublications)

**Uric acid (UA) level is associated with poor prognosis in PAH. Local UA production is increased in the remodelled pulmonary vasculature, and inhibition of UA incorporation in PA-SMCs reduces their proliferation and mildly reduces experimental PH.** <https://bit.ly/2LI5qXM>

**Cite this article as:** Savale L, Akagi S, Tu L, et al. Serum and pulmonary uric acid in pulmonary arterial hypertension. *Eur Respir J* 2021; 58: 2000332 [DOI: 10.1183/13993003.00332-2020].

This single-page version can be shared freely online.

## Abstract

Previous studies have suggested an association between uric acid (UA) and the severity of pulmonary arterial hypertension (PAH), but it is unknown whether UA contributes to disease pathogenesis.

The aim of this study was to determine the prognostic value of circulating UA in the era of current management of PAH and to investigate the role of UA in pulmonary vascular remodelling.

Serum UA levels were determined in idiopathic, heritable or anorexigen PAH at baseline and first re-evaluation in the French Pulmonary Hypertension Network. We studied protein levels of xanthine oxidase (XO) and the voltage-driven urate transporter 1 (URATv1) in lungs of control and PAH patients and of monocrotaline (MCT) and Sugen/hypoxia (SuHx) rats. Functional studies were performed using human pulmonary artery smooth muscle cells (PA-SMCs) and two animal models of pulmonary hypertension (PH).

High serum UA levels at first follow-up, but not at baseline, were associated with a poor prognosis. Both the generating enzyme XO and URATv1 were upregulated in the wall of remodelled pulmonary arteries in idiopathic PAH patients and MCT and SuHx rats. High UA concentrations promoted a mild increase in cell growth in idiopathic PAH PA-SMCs, but not in control PA-SMCs. Consistent with these observations, oxonic acid-induced hyperuricaemia did not aggravate MCT-induced PH in rats. Finally, chronic treatment of MCT and SuHx rats with benzbromarone mildly attenuated pulmonary vascular remodelling.

UA levels in idiopathic PAH patients were associated with an impaired clinical and haemodynamic profile and might be used as a non-invasive indicator of clinical prognosis during follow-up. Our findings also indicate that UA metabolism is disturbed in remodelled pulmonary vascular walls in both experimental and human PAH.

Copyright ©The authors 2021. For reproduction rights and permissions contact [permissions@ersnet.org](mailto:permissions@ersnet.org)

This article has supplementary material available from [erj.ersjournals.com](http://erj.ersjournals.com)

Received: 15 Feb 2020  
Accepted: 20 Dec 2020
